# Supplementary material for: Flow cytometric characterization of freshly isolated and culture expanded human synovial cell populations in patients with chronic arthritis
Source: PubMed Central journal article supplement (PMC2875643; doi:10.1186/ar2916), 2010-01-27

**A**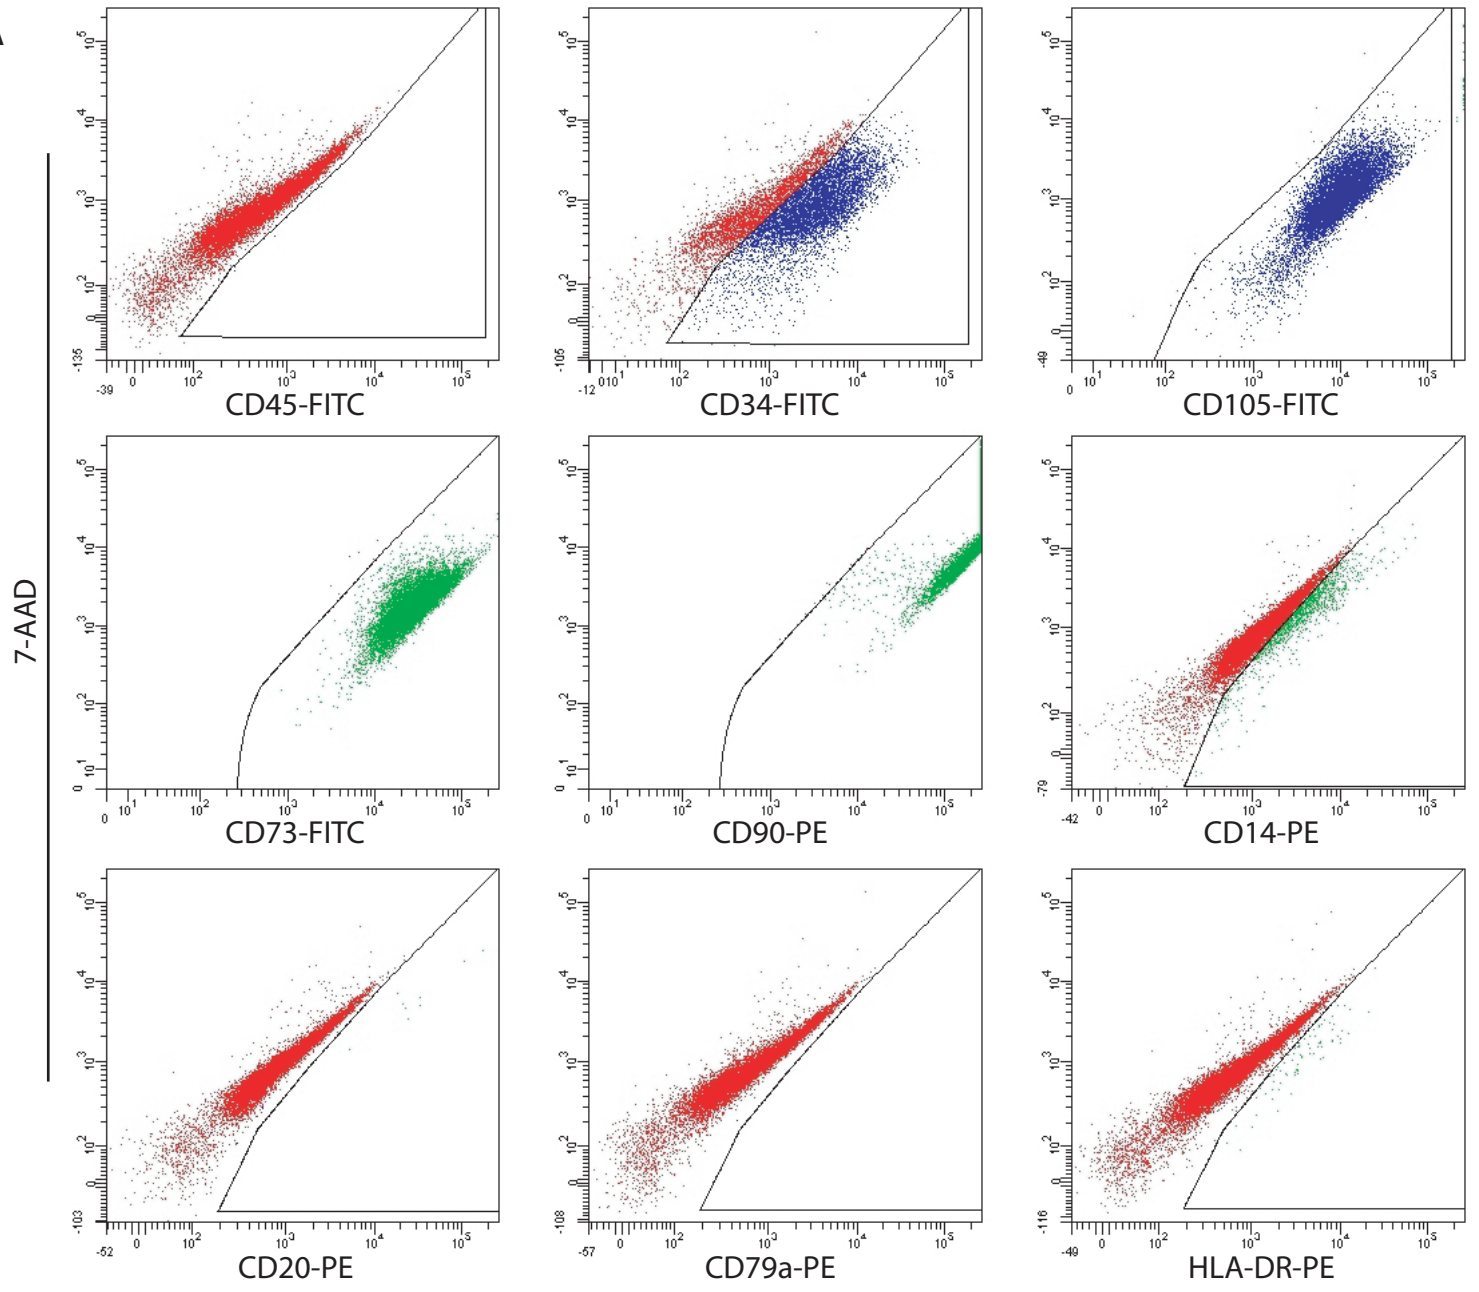**B**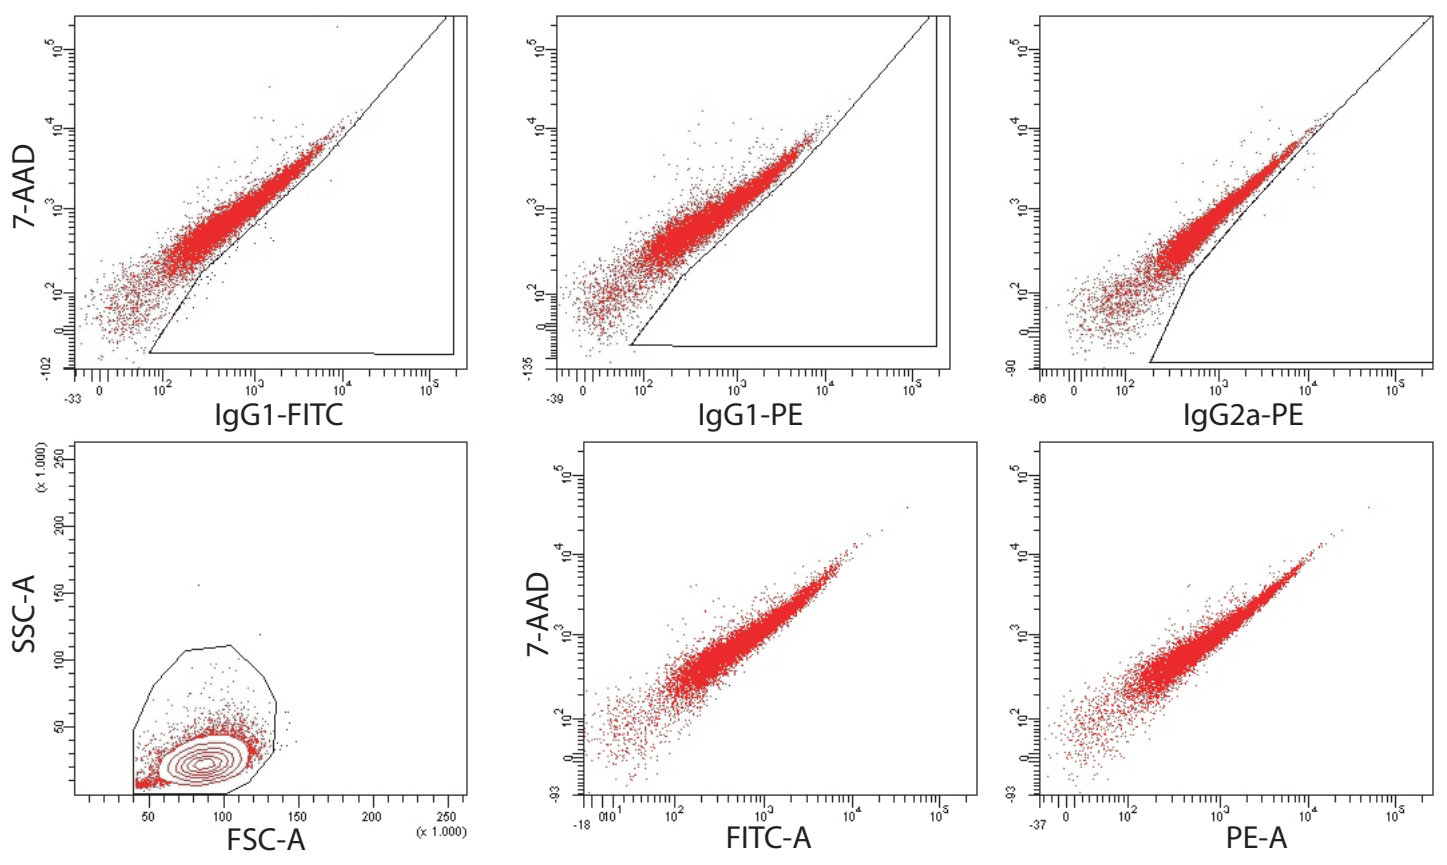

Supplement: ar2916-S2.pdf [file ar2916-S2.pdf]
